# Supplementary material
Source: PubMed Central journal article supplement (PMC1937547)

a) Asexual wins

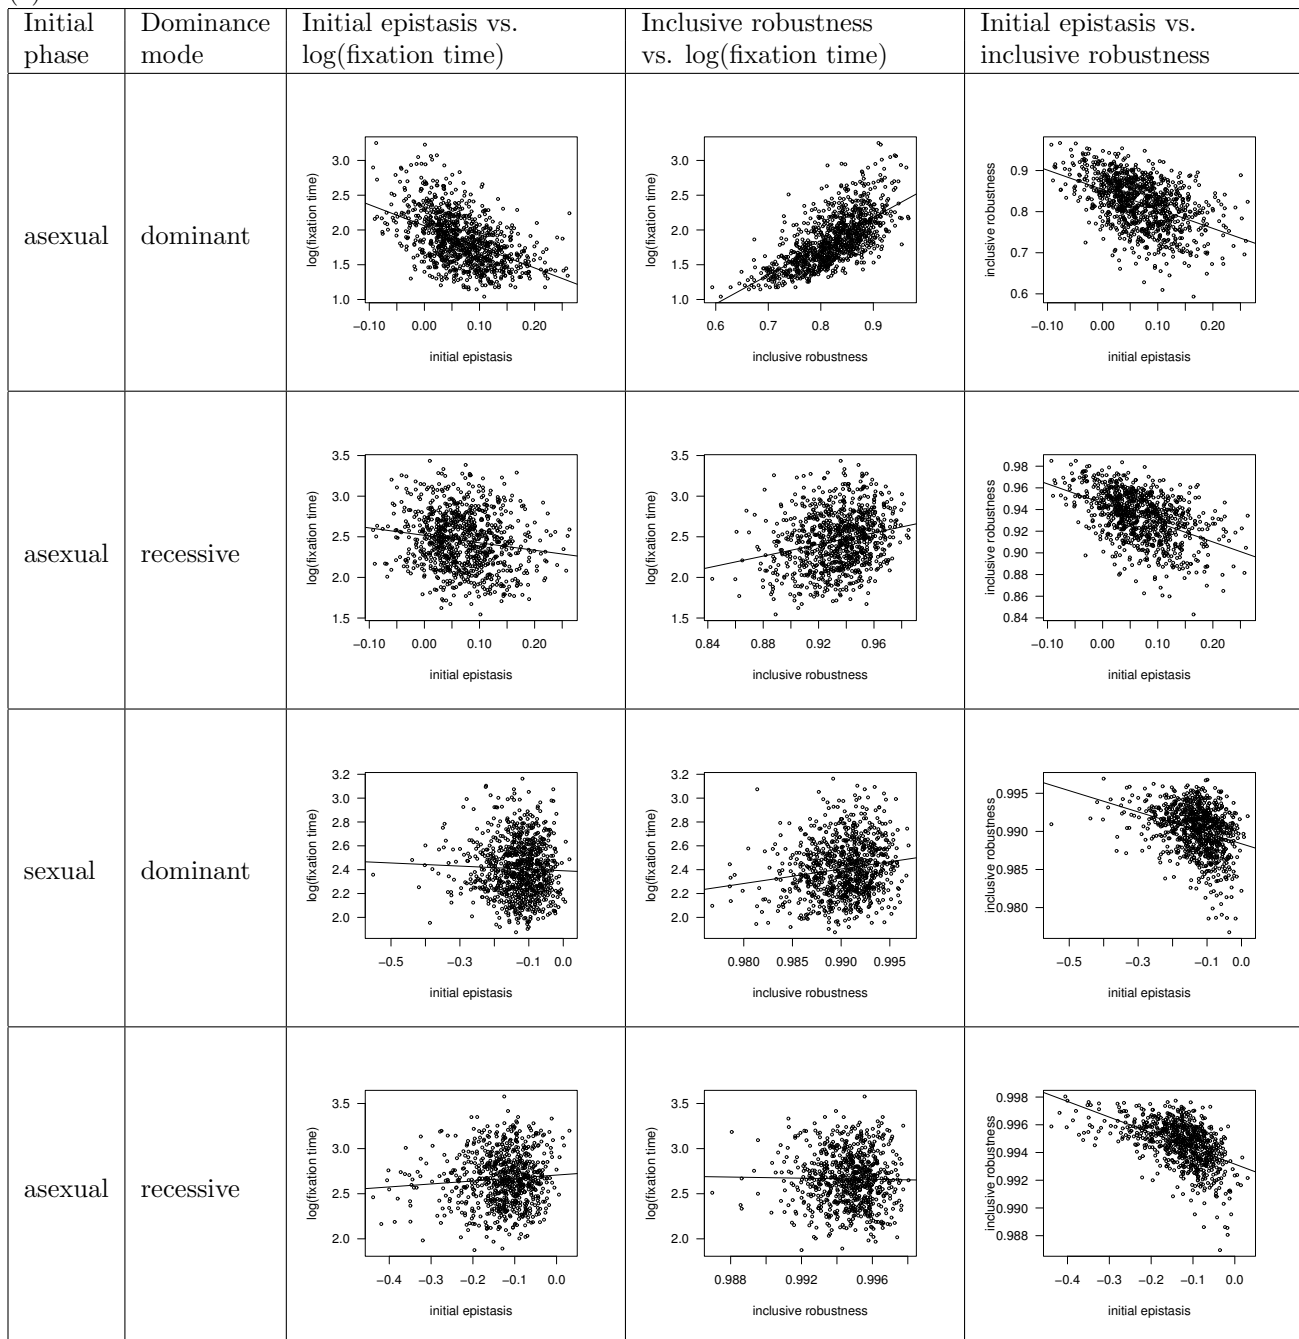

## a) Sexual wins

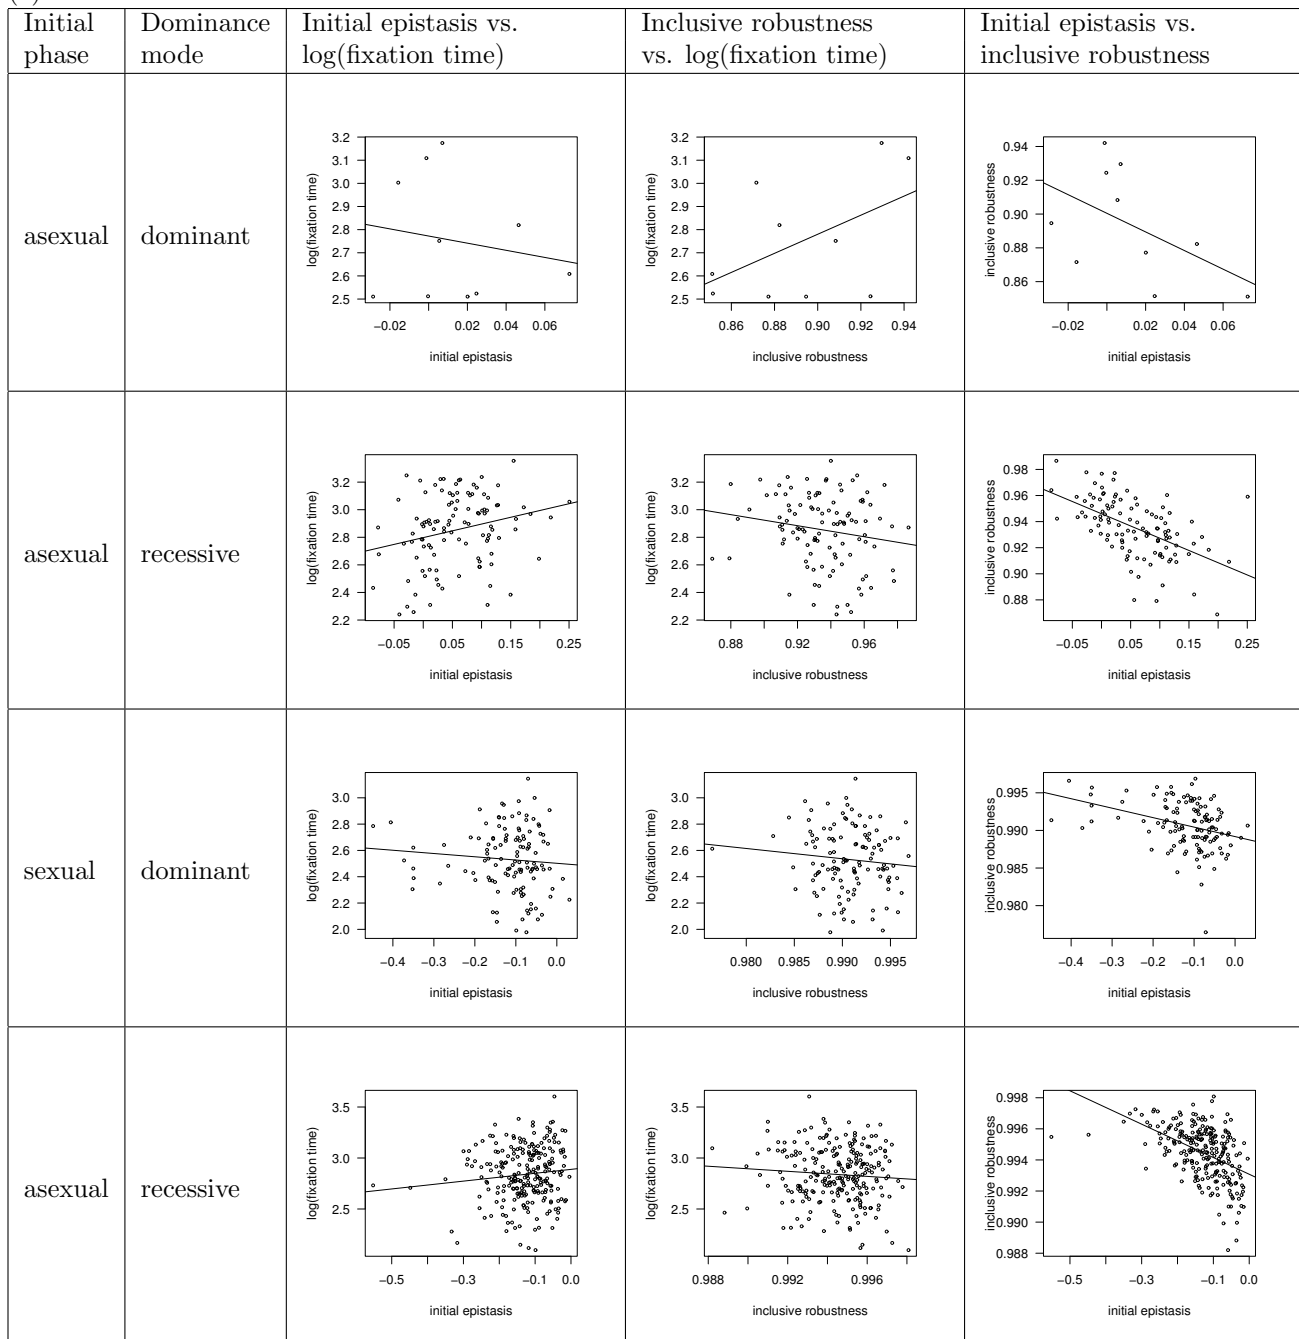

Supplement: pnas_0705455104_1.pdf [file pnas_0705455104_1.pdf]

a

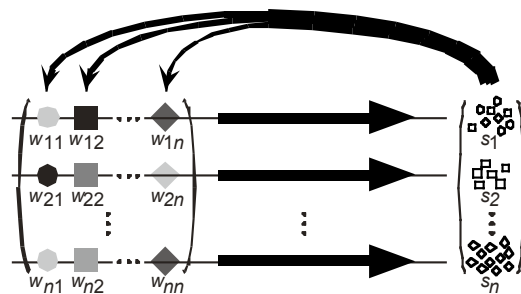

b

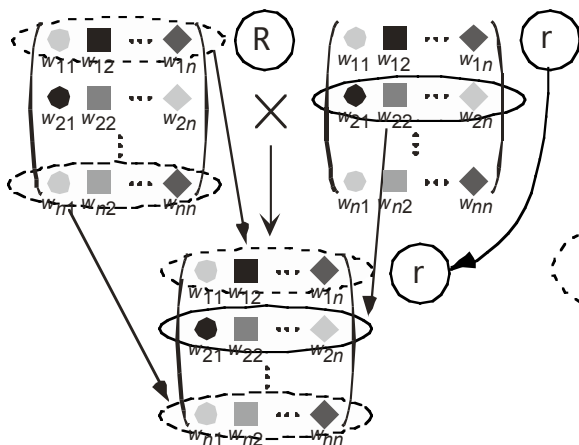

c

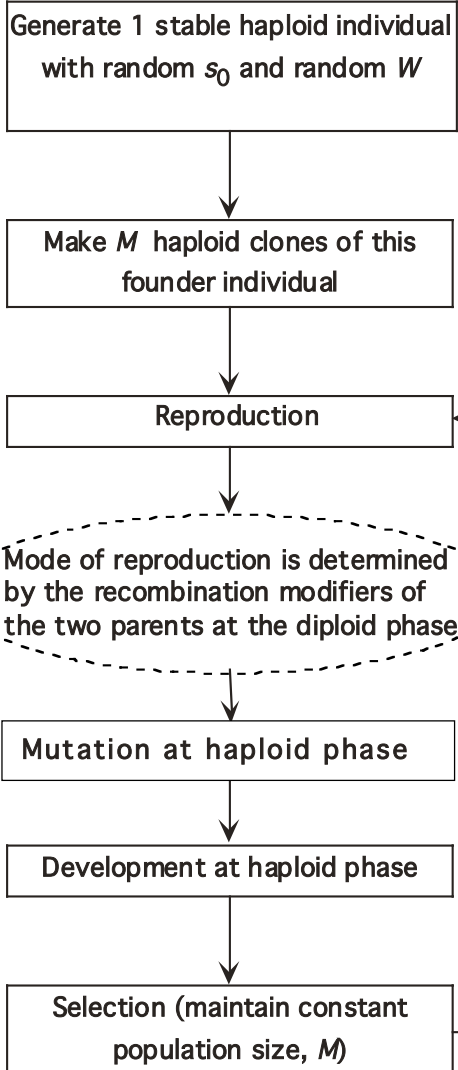

Supplement: pnas_0705455104_2.pdf [file pnas_0705455104_2.pdf]
